# Supplementary material
Source: PubMed Central journal article supplement (PMC3573720)
Supplement: Supp_Fig1.pdf [file Supp_Fig1.pdf]

## Supplementary Data

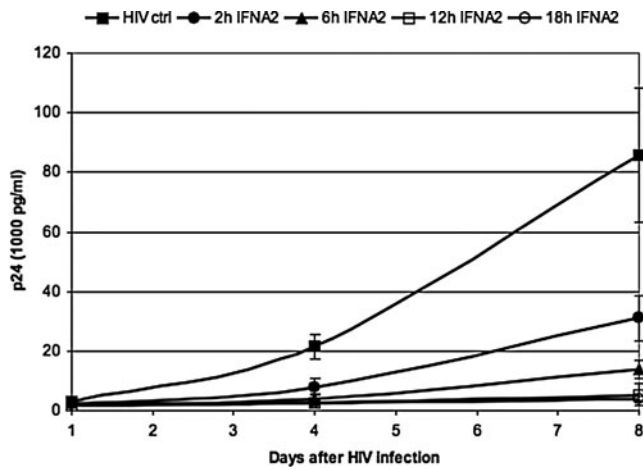

**SUPPLEMENTARY FIG. S1.** Minimum period of interferon (IFN)- $\alpha$ 2 treatment required for maximal protection of monocyte-derived macrophages (MDMs) from HIV replication. MDMs from a single donor (Donor 3) were pretreated with IFN- $\alpha$ 2 (186 pM) for 2, 6, 12, or 18 h or mock-treated (HIV ctrl), and then infected with HIV BaL (multiplicity of infection=0.3) for 2 h. An enzyme-linked immunosorbent assay for p24 antigen was performed at day 1, 4, and 8, after infection to measure HIV replication. Each data point represents an average p24 measurement derived from 8 replicate wells. Error bars reflect the standard deviation of the mean.
